# Supplementary material for: Small polarons in Nb- and Ta-doped rutile and anatase TiO2
Source: Royal Society of Chemistry journal article supplement (doi:10.1039/b905028k), 2009-01-01
Supplement: b905028k_addcorr.pdf [file b905028k_addcorr.pdf]

## Small polarons in Nb- and Ta-doped rutile and anatase TiO<sub>2</sub>

Benjamin J. Morgan, David O. Scanlon and Graeme W. Watson

*J. Mater. Chem.*, 2009, **19**, 5175–5178 (DOI: 10.1039/b905028k)

Figures 2 and 4 are interchanged. The correct figure and caption combinations are shown below:

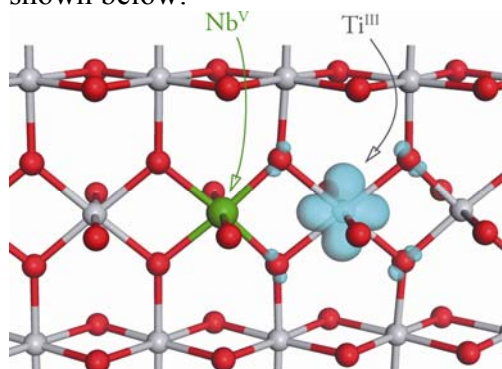

**Fig. 2** A slice through a (110) plane of the Nb-doped rutile TiO<sub>2</sub> system, showing the charge density associated with the gap state in [Fig. 1\(b\)](#). The Nb dopant is shown in green. Ti atoms are grey, and oxygen atoms are red. The charge isosurface is shown at a density of 0.05 e Å<sup>-3</sup>.

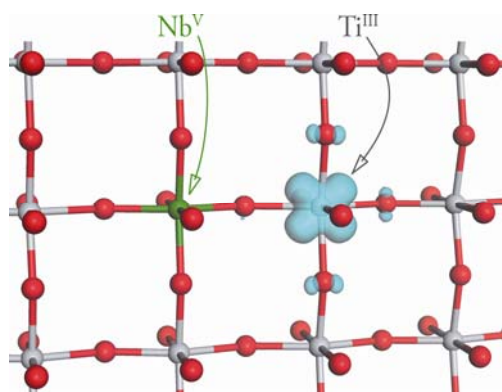

**Fig. 4** A slice through a (001) plane of the Nb-doped anatase TiO<sub>2</sub> system, showing the charge density associated with the gap state in [Fig. 3\(b\)](#). The Nb dopant is shown in green. Ti atoms are grey and oxygen atoms are red. The charge isosurface is shown at a density of 0.05 e Å<sup>-3</sup>.

---

The Royal Society of Chemistry apologises for these errors and any consequent inconvenience to authors and readers.

**Additions and corrections can be viewed online by accessing the original article to which they apply.**

---
